# Supplementary material for: PLK4 is a key molecule in the formation of PGCCs and promotes invasion and migration of progeny cells derived from PGCCs
Source: PubMed Central journal article supplement (PMC9330457; doi:10.7150/jca.74211), 2022-07-18
Supplement: jcav13p2954s1.pdf [file jcav13p2954s1.pdf]

## Supplementary figure legends

Supplementary figure 1: A. The scatter plot of the three most significant gene modules: (a) black module, (b) yellow module, and (c) blue module. B. The survival curve of the five genes screened using TCGA online tool. a. *MCM10*. b. *TTK*. c. *BUB1*. d. *DNA2*. e. *KIF23*. C. *PLK4* expression in ncm460 and LoVo, Hct116. D. Histogram showed the statistical results of *PLK4* expression between ncm460 and LoVo, Hct116 (\* $P < 0.01$ ).

TCGA, the Cancer Genome Atlas.

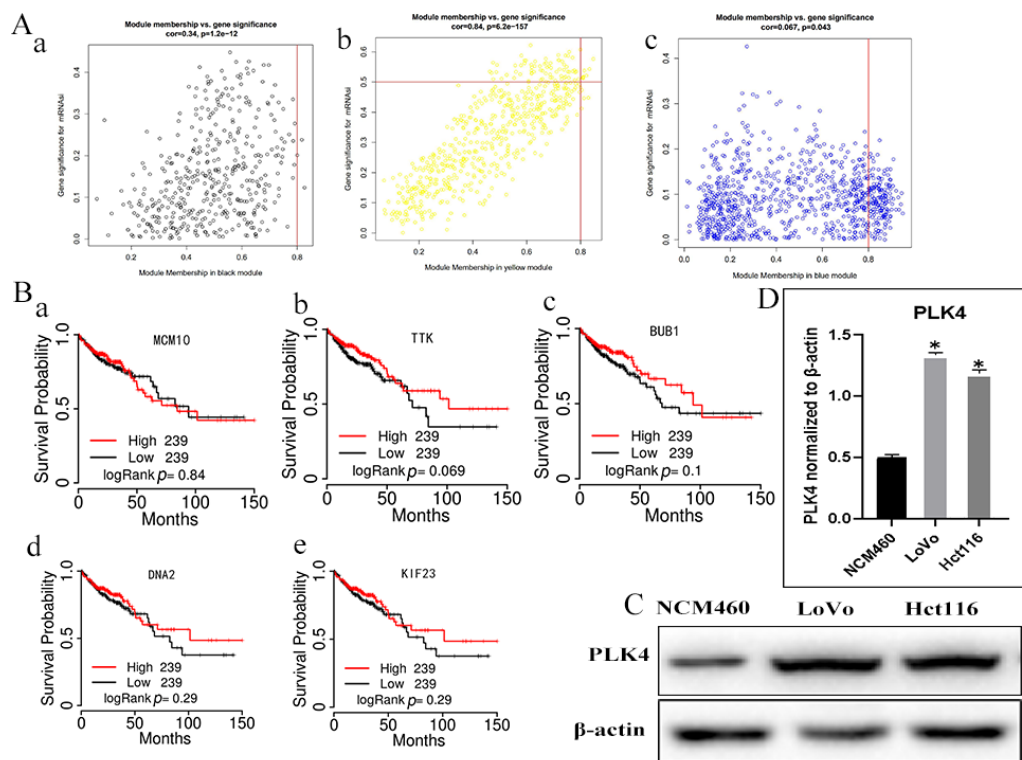

Supplementary figure 2: A. Comparison of the migration rate of bufalin-treated LoVo and Hct116 cells with or without CFI-400945 using Wound-healing assay. B. Comparison of the migration and invasion abilities of bufalin-treated LoVo and Hct116 cells with or without CFI-400945 using transwell assay (200 $\times$ ). C. Comparison of the number of cell colonies after 30, 60 and 120 bufalin-treated LoVo and Hct116 cells with or without CFI-400945 treatment were incubated in 12-well plates. D. Column diagram of the functional experiment. a. Column diagram of colony formation efficiency (a), migration (b,d) and invasion (c) abilities of LoVo and Hct116

cells treated with bufalin (\*\* $P < 0.01$ ).

LC, LoVo control cells. HC, Hct116 control cells. LB, LoVo cells treated with bufalin.

HB, Hct116 cells treated with bufalin.

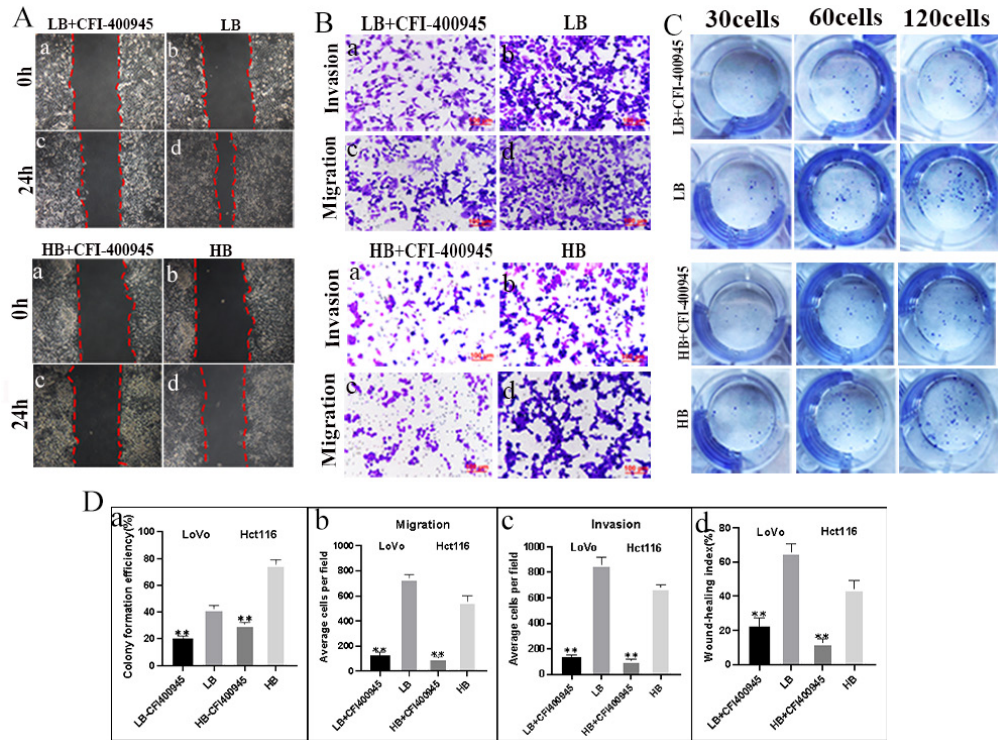

Supplementary figure 3: A. Column diagram showed the differences of CDC25C, pCDC25C-ser198, and pCDC25C-ser216. CDC25C(a), pCDC25C-ser198(b), pCDC25C-ser216(c) expression in total protein in LoVo and Hct116 cells treated with and without bufalin (\*\* $P < 0.01$ , \* $P < 0.05$ ). pCDC25C-ser198 expression in cell nucleus (d), CDC25C expression in cytoplasm (e) and nucleus (f) in LoVo and Hct116 cells treated with and without bufalin. pCDC25C-ser216 expression in cytoplasm (g). B. ICC staining of CDC25C in LoVo and Hct116 cells (200 $\times$ ). (a) CDC25C in LoVo cells without bufalin treatment. (b) CDC25C in LoVo cells treated with bufalin. (c) CDC25C in Hct116 cells without bufalin treatment. (d) CDC25C in Hct116 cells treated with bufalin. C. ICC staining of pCDC25C-ser216 in LoVo and Hct116 cells with and without bufalin treatment (200 $\times$ ). (a) pCDC25C-ser216 in LoVo cells without bufalin treatment. (b) pCDC25C-ser216 in LoVo cells after bufalin treatment. (c) pCDC25C-ser216 in Hct116 cells without bufalin treatment. (d) CDC25C-Ser216 in Hct116 cells with bufalin treatment. D. ICC staining of pCDC25C-ser198 in LoVo

and Hct116 cells with and without bufalin treatment (200×). (a) pCDC25C-ser198 in LoVo cells without bufalin treatment. (b) pCDC25C-ser198 in LoVo cells after bufalin treatment. (c) pCDC25C-ser198 in Hct116 cells without bufalin treatment. (d) CDC25C-Ser198 in Hct116 cells with bufalin treatment.

ICC, immunocytochemical.

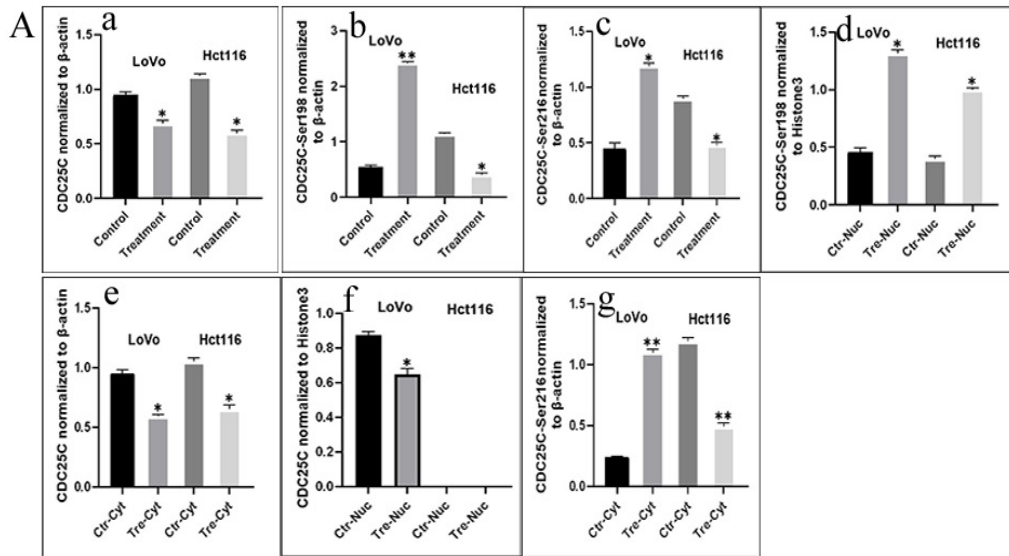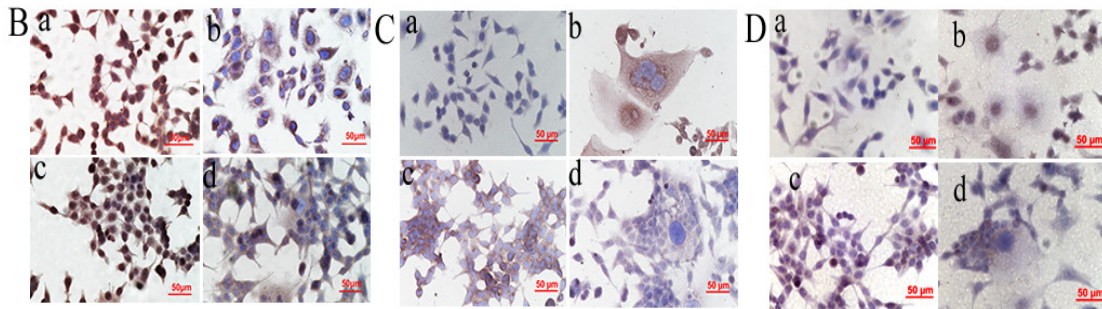

Supplementary table 1. Detailed information of the antibodies utilized in this study.

| Antibody        | Company                   | Dilution                   |
|-----------------|---------------------------|----------------------------|
| E-cadherin      | Proteintech               | 1:50000(WB); 1:500(ICC)    |
| Vimentin        | Immunoway                 | 1:2000(WB); 1:200(ICC)     |
| Snail           | Novus                     | 1:1000(WB); 1:500(ICC)     |
| Twist           | Proteintech               | 1:1000(WB); 1:500(ICC)     |
| N-cadherin      | Wanlei                    | 1:500(WB)                  |
| PLK4            | Abbkine                   | 1:1000(WB)                 |
| PLK4            | Affnity                   | 1:1000(WB); 1:400(ICC/IHC) |
| GAPDH           | Zhongshan, Beijing        | 1:1000(WB)                 |
| CDC25C          | Abcam                     | 1:2500(WB)                 |
| CDC25C          | Affnity                   | 1:500(WB);1:300(ICC)       |
| PCDC25C-Ser216  | Affnity                   | 1:200(WB); 1:200(ICC)      |
| PCDC25C-Ser198  | Affnity                   | 1:200(WB);1:200(ICC)       |
| $\beta$ -actin  | Zhongshan, Beijing        | 1:1000(WB)                 |
| Histone3        | Affnity                   | 1:1000(WB)                 |
| Anti-rabbit IgG | Cell Signaling Technology | 1:3000(WB)                 |
| Anti-mouse IgG  | Cell Signaling Technology | 1:3000(WB)                 |

WB: Western blot; ICC:Immunocytochemistry staining; IHC: Immunohistochemical staining

Supplementary table 2. Sequences of small interfering RNAs (siRNA) targeted to the PLK4.

| SiRNA      | Sense (5'-3')         | Antisense (5'-3')     |
|------------|-----------------------|-----------------------|
| PLK4i-482  | CCUUCUAUCUUGGAGCUUUTT | AAAGCUCCAAGAUAGAAGGTT |
| PLK4i-950  | GCAGAUUAUGAAAUGCCAUTT | AUGGCAUUUCAUAAUCUGCTT |
| PLK4i-1136 | GCCACAAUUCUACUGCAATT  | UUGCAGUAGAAAUUGUGGCTT |
| PLK4i -PC  | CACUCAAGAUUGUCAGCAATT | UUGCUGACAAUCUUGAGUGAG |
| PLK4i -NC  | UUCUCCGAACGUGUCACGUTT | ACGUGACACGUUCGGAGAATT |

PC: GAPDH positive control; NC: Negative control, PLK4i: PLK4 knockdown.
